# Supplementary material for: Salicylate, diflunisal and their metabolites inhibit CBP/p300 and exhibit anticancer activity
Source: eLife journal article supplement (doi:10.7554/elife.11156), 2016-05-31
Supplement: supp [file elife_poa_e11156_Figure_1_figure_supplement_1.pdf › elife_poa_e11156_Figure_1_figure_supplement_1.pdf]

**A**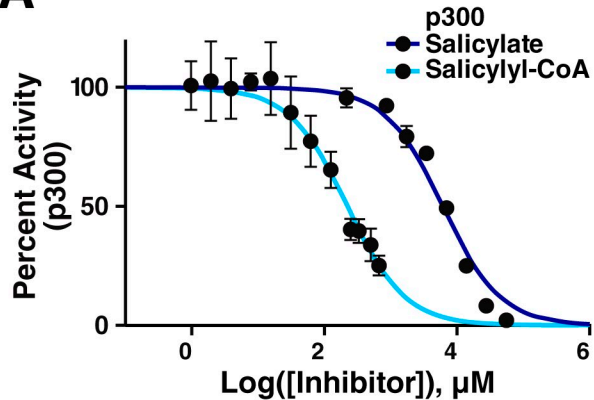

|              | p300<br>IC50 (mM) | Confidence Interval<br>[CI95] (mM) |
|--------------|-------------------|------------------------------------|
| Salicylate:  | 6.12              | 5.2–7.2                            |
| Salicyl-CoA: | 0.22              | 0.18–0.27                          |

**B**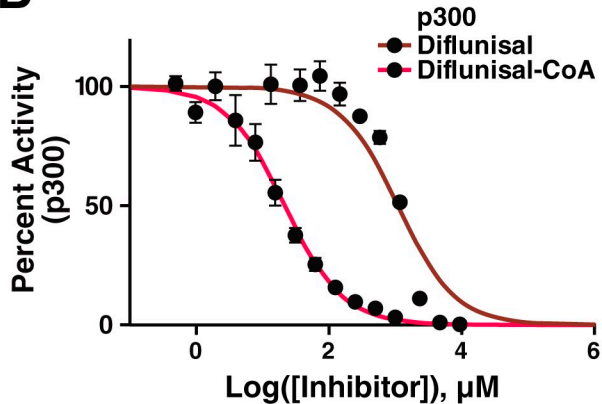

|                 | p300<br>IC50 (mM) | Confidence Interval<br>[CI95] (mM) |
|-----------------|-------------------|------------------------------------|
| Diflunisal:     | 1.05              | 0.78–1.4                           |
| Diflunisal-CoA: | 0.02              | 0.02–0.03                          |
