# Supplementary material for: Salicylate, diflunisal and their metabolites inhibit CBP/p300 and exhibit anticancer activity
Source: eLife journal article supplement (doi:10.7554/elife.11156), 2016-05-31
Supplement: supp [file elife_poa_e11156_Figure_2_figure_supplement_2.pdf › elife_poa_e11156_Figure_2_figure_supplement_2.pdf]

**A**

|                | p300 |      |     |     |     |     | Y1503A | F1504A |                         |
|----------------|------|------|-----|-----|-----|-----|--------|--------|-------------------------|
|                | 0    | 0.25 | 0.5 | 1.0 | 2.0 | 4.0 |        |        |                         |
|                |      |      |     |     |     |     |        |        | $\alpha$ -AcH2B K12/K15 |
|                |      |      |     |     |     |     |        |        | $\alpha$ -H2B           |
| $\alpha$ -p300 |      |      |     |     |     |     |        |        |                         |
|                |      |      |     |     |     |     |        |        | $\alpha$ -Tubulin       |

  

|  | PCAF |      |     |     |     |     |                         |
|--|------|------|-----|-----|-----|-----|-------------------------|
|  | 0    | 0.25 | 0.5 | 1.0 | 2.0 | 4.0 |                         |
|  |      |      |     |     |     |     | $\alpha$ -AcH2B K12/K15 |
|  |      |      |     |     |     |     | $\alpha$ -H2B           |
|  |      |      |     |     |     |     | $\alpha$ -PCAF          |
|  |      |      |     |     |     |     | $\alpha$ -Tubulin       |

**B**

|                         | p300                 |  |  |  |  | PCAF                 |  |  |  |  |                       |
|-------------------------|----------------------|--|--|--|--|----------------------|--|--|--|--|-----------------------|
| $\alpha$ -AcH2B K12/K15 |                      |  |  |  |  |                      |  |  |  |  | 0 $\mu$ g             |
| $\alpha$ -H2B           |                      |  |  |  |  |                      |  |  |  |  |                       |
| $\alpha$ -AcH2B K12/K15 |                      |  |  |  |  |                      |  |  |  |  | 0.25 $\mu$ g          |
| $\alpha$ -H2B           |                      |  |  |  |  |                      |  |  |  |  |                       |
| $\alpha$ -AcH2B K12/K15 |                      |  |  |  |  |                      |  |  |  |  | 0.5 $\mu$ g           |
| $\alpha$ -H2B           |                      |  |  |  |  |                      |  |  |  |  |                       |
| $\alpha$ -AcH2B K12/K15 |                      |  |  |  |  |                      |  |  |  |  | 1.0 $\mu$ g           |
| $\alpha$ -H2B           |                      |  |  |  |  |                      |  |  |  |  |                       |
| $\alpha$ -AcH2B K12/K15 |                      |  |  |  |  |                      |  |  |  |  | 2.0 $\mu$ g           |
| $\alpha$ -H2B           |                      |  |  |  |  |                      |  |  |  |  |                       |
| $\alpha$ -AcH2B K12/K15 |                      |  |  |  |  |                      |  |  |  |  | 4.0 $\mu$ g           |
| $\alpha$ -H2B           |                      |  |  |  |  |                      |  |  |  |  |                       |
| $\alpha$ -AcH2B K12/K15 |                      |  |  |  |  |                      |  |  |  |  | Y1503A<br>4.0 $\mu$ g |
| $\alpha$ -H2B           |                      |  |  |  |  |                      |  |  |  |  |                       |
| $\alpha$ -AcH2B K12/K15 |                      |  |  |  |  |                      |  |  |  |  | F1504A<br>4.0 $\mu$ g |
| $\alpha$ -H2B           |                      |  |  |  |  |                      |  |  |  |  |                       |
|                         | 0 1.25 2.5 5.0 10 20 |  |  |  |  | 0 1.25 2.5 5.0 10 20 |  |  |  |  |                       |
|                         | Salicylate (mM)      |  |  |  |  | Salicylate (mM)      |  |  |  |  |                       |
