# Supplementary figures and images for: Salicylate, diflunisal and their metabolites inhibit CBP/p300 and exhibit anticancer activity
Source: eLife journal article supplement (doi:10.7554/elife.11156), 2016-05-31

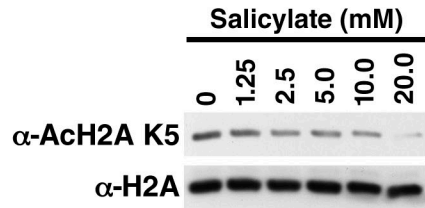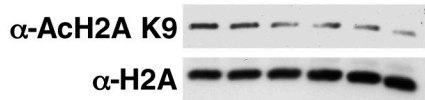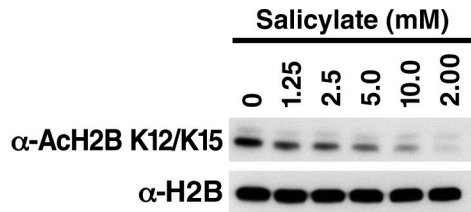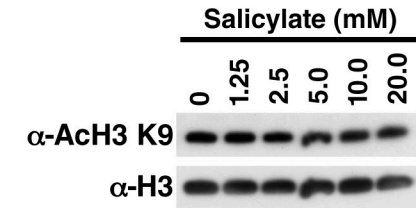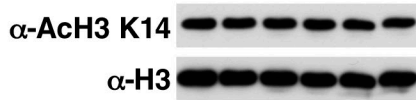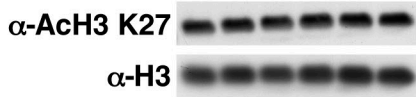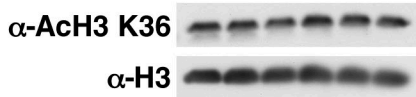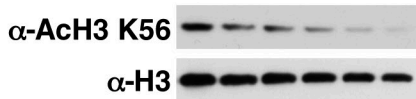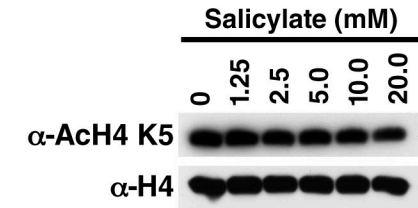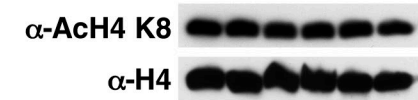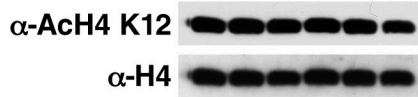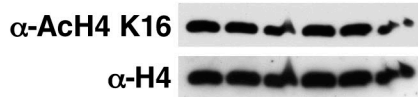

Supplement: supp [file elife_poa_e11156_Figure_2_figure_supplement_1.pdf › elife_poa_e11156_Figure_2_figure_supplement_1.pdf]

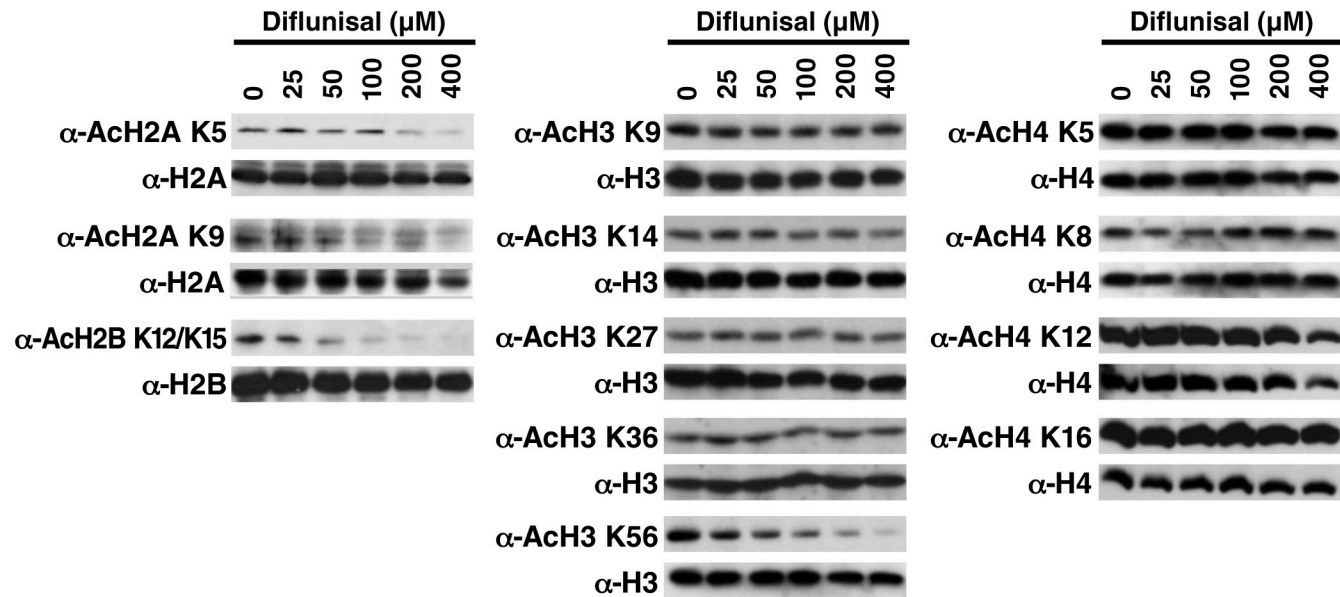

Supplement: supp [file elife_poa_e11156_Figure_3_figure_supplement_1.pdf › elife_poa_e11156_Figure_3_figure_supplement_1.pdf]

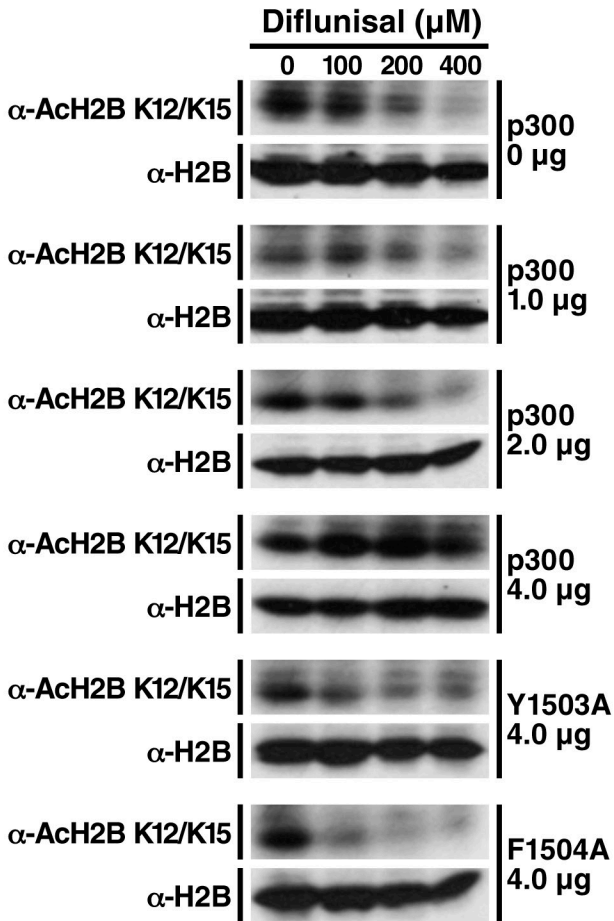

Supplement: supp [file elife_poa_e11156_Figure_3_figure_supplement_2.pdf › elife_poa_e11156_Figure_3_figure_supplement_2.pdf]
